# Supplementary material for: Predicting glycosylation stereoselectivity using machine learning
Source: Chem Sci. 2020 Dec 26;12(8):2931–9. doi: 10.1039/d0sc06222g (PMC8179398; doi:10.1039/d0sc06222g)
Supplement: SC-012-D0SC06222G-s003 [file SC-012-D0SC06222G-s003.xlsx]

## Sheet: total
Entry	Temp. (°C)	Donor	Acceptor	Activator	Solvent	Yield (%)	α ratio (%)	β ratio (%)	Product
1	-50	Glc1α	MeOH	TfOH	DCM	92.4	29.6438	70.3562	1α, 1β
2	-30	Glc1α	MeOH	TfOH	DCM	95.7	32.5074	67.4926	1α, 1β
3	-10	Glc1α	MeOH	TfOH	DCM	98.7	38.6508	61.3492	1α, 1β
4	10	Glc1α	MeOH	TfOH	DCM	98.1	46.4643	53.5357	1α, 1β
5	20	Glc1α	MeOH	TfOH	DCM	94.1	48.7227	51.2773	1α, 1β
6	30	Glc1α	MeOH	TfOH	DCM	93.7	52.6092	47.3908	1α, 1β
7	-50	Glc1α	EtOH	TfOH	DCM	83.2	15.5482	84.4518	2α, 2β
8	-30	Glc1α	EtOH	TfOH	DCM	83.5	29.4399	70.5601	2α, 2β
9	-10	Glc1α	EtOH	TfOH	DCM	100	36.012	63.988	2α, 2β
10	10	Glc1α	EtOH	TfOH	DCM	87	46.1629	53.8371	2α, 2β
11	20	Glc1α	EtOH	TfOH	DCM	90.7	50.2004	49.7996	2α, 2β
12	30	Glc1α	EtOH	TfOH	DCM	83.5	55.5245	44.4755	2α, 2β
13	-50	Glc1α	iPrOH	TfOH	DCM	98.3	26.853	73.147	3α, 3β
14	-30	Glc1α	iPrOH	TfOH	DCM	88.5	38.8386	61.1614	3α, 3β
15	-10	Glc1α	iPrOH	TfOH	DCM	90.1	46.7177	53.2823	3α, 3β
16	10	Glc1α	iPrOH	TfOH	DCM	99.2	52.5594	47.4406	3α, 3β
17	20	Glc1α	iPrOH	TfOH	DCM	84	57.6877	42.3123	3α, 3β
18	30	Glc1α	iPrOH	TfOH	DCM	82.1	60.9595	39.0405	3α, 3β
19	-50	Glc1β	iPrOH	TfOH	DCM	88.6	27.7251	72.2749	3α, 3β
20	-45	Glc1β	iPrOH	TfOH	DCM	79.4	30.615	69.385	3α, 3β
21	-40	Glc1β	iPrOH	TfOH	DCM	70.6	32.6578	67.3423	3α, 3β
22	-35	Glc1β	iPrOH	TfOH	DCM	65	34.4333	65.5667	3α, 3β
23	-30	Glc1β	iPrOH	TfOH	DCM	77.9	36.69	63.31	3α, 3β
24	-25	Glc1β	iPrOH	TfOH	DCM	72.4	37.4372	62.5628	3α, 3β
25	-20	Glc1β	iPrOH	TfOH	DCM	71.2	38.6412	61.3588	3α, 3β
26	-15	Glc1β	iPrOH	TfOH	DCM	94.7	41.9307	58.0693	3α, 3β
27	-10	Glc1β	iPrOH	TfOH	DCM	94.7	43.6636	56.3364	3α, 3β
28	-5	Glc1β	iPrOH	TfOH	DCM	95.9	45.64	54.36	3α, 3β
29	5	Glc1β	iPrOH	TfOH	DCM	93.5	50.5275	49.4725	3α, 3β
30	10	Glc1β	iPrOH	TfOH	DCM	94.8	53.1965	46.8035	3α, 3β
31	15	Glc1β	iPrOH	TfOH	DCM	87.1	55.0159	44.9841	3α, 3β
32	20	Glc1β	iPrOH	TfOH	DCM	89.4	56.8046	43.1954	3α, 3β
33	25	Glc1β	iPrOH	TfOH	DCM	88.7	58.2565	41.7435	3α, 3β
34	30	Glc1β	iPrOH	TfOH	DCM	79.1	59.5994	40.4006	3α, 3β
35	-50	Glc1α	tBuOH	TfOH	DCM	77.9	38.1098	61.8902	4α, 4β
36	-30	Glc1α	tBuOH	TfOH	DCM	87.7	44.798	55.202	4α, 4β
37	-10	Glc1α	tBuOH	TfOH	DCM	88.3	54.4709	45.5291	4α, 4β
38	10	Glc1α	tBuOH	TfOH	DCM	88.3	62.8031	37.1969	4α, 4β
39	20	Glc1α	tBuOH	TfOH	DCM	91.5	66.7826	33.2174	4α, 4β
40	30	Glc1α	tBuOH	TfOH	DCM	80.7	71.02	28.98	4α, 4β
41	-10	Glc2β	iPrOH	TfOH	DCM	44.6	37.9711	62.0289	3α, 3β
42	10	Glc2β	iPrOH	TfOH	DCM	88.1	54.4854	45.5146	3α, 3β
43	20	Glc2β	iPrOH	TfOH	DCM	89.5	57.5221	42.4779	3α, 3β
44	30	Glc2β	iPrOH	TfOH	DCM	90.4	63.8368	36.1632	3α, 3β
45	-50	Glc1α	tBuOH	Tf2NH	DCM	67.2	6.10975	93.8902	4α, 4β
46	-30	Glc1α	tBuOH	Tf2NH	DCM	62.1	16.7897	83.2103	4α, 4β
47	-10	Glc1α	tBuOH	Tf2NH	DCM	55.2	35.2192	64.7808	4α, 4β
48	20	Glc1α	tBuOH	Tf2NH	DCM	59.5	47.8747	52.1253	4α, 4β
49	-50	Glc1α	iPrOH	Tf2NH	DCM	95.5	8.7	91.3	3α, 3β
50	-30	Glc1α	iPrOH	Tf2NH	DCM	89.3	16.4	83.6	3α, 3β
51	-10	Glc1α	iPrOH	Tf2NH	DCM	82.2	26.8	73.2	3α, 3β
52	10	Glc1α	iPrOH	Tf2NH	DCM	79.2	42.1	57.9	3α, 3β
53	20	Glc1α	iPrOH	Tf2NH	DCM	76.7	47.5	52.5	3α, 3β
54	30	Glc1α	iPrOH	Tf2NH	DCM	76	55	45	3α, 3β
55	-50	Glc1α	EtOH	Tf2NH	DCM	64.2	5.81306	94.1869	2α, 2β
56	-30	Glc1α	EtOH	Tf2NH	DCM	64.1	10.4395	89.5605	2α, 2β
57	-10	Glc1α	EtOH	Tf2NH	DCM	62.6	19.6415	80.3585	2α, 2β
58	10	Glc1α	EtOH	Tf2NH	DCM	65.5	33.5956	66.4044	2α, 2β
59	20	Glc1α	EtOH	Tf2NH	DCM	57.4	39.0023	60.9977	2α, 2β
60	30	Glc1α	EtOH	Tf2NH	DCM	53.8	44.993	55.007	2α, 2β
61	-50	Glc1α	iPrOH	TfOH	Toluene	65.7	19.1038	80.8962	3α, 3β
62	-30	Glc1α	iPrOH	TfOH	Toluene	84	35.5211	64.4789	3α, 3β
63	-10	Glc1α	iPrOH	TfOH	Toluene	86.2	49.9433	50.0567	3α, 3β
64	10	Glc1α	iPrOH	TfOH	Toluene	85	61.5736	38.4264	3α, 3β
65	30	Glc1α	iPrOH	TfOH	Toluene	84.5	64.1316	35.8684	3α, 3β
66	50	Glc1α	iPrOH	TfOH	Toluene	81.3	63.8828	36.1172	3α, 3β
67	70	Glc1α	iPrOH	TfOH	Toluene	70.2	62.2943	37.7057	3α, 3β
68	-50	Glc1β	iPrOH	TfOH	Toluene	84.7832	60.8	39.2	3α, 3β
69	-30	Glc1β	iPrOH	TfOH	Toluene	85.3561	60.3	39.7	3α, 3β
70	-10	Glc1β	iPrOH	TfOH	Toluene	90.915	62.1633	39.8367	3α, 3β
71	10	Glc1β	iPrOH	TfOH	Toluene	86.1417	65.6	34.4	3α, 3β
72	30	Glc1β	iPrOH	TfOH	Toluene	85.2632	63.3	36.7	3α, 3β
73	50	Glc1β	iPrOH	TfOH	Toluene	68.6064	62.2	37.8	3α, 3β
74	70	Glc1β	iPrOH	TfOH	Toluene	56.8643	61.2	38.8	3α, 3β
75	-50	Glc1α	EtOH	TfOH	Toluene	90.4	9.9	90.1	2α, 2β
76	-30	Glc1α	EtOH	TfOH	Toluene	91.5	19.9765	80.0235	2α, 2β
77	-10	Glc1α	EtOH	TfOH	Toluene	89.7	32.2209	67.7791	2α, 2β
78	10	Glc1α	EtOH	TfOH	Toluene	85.8	42.5362	57.4638	2α, 2β
79	30	Glc1α	EtOH	TfOH	Toluene	82.2	49.5594	50.4406	2α, 2β
80	50	Glc1α	EtOH	TfOH	Toluene	75.6	53.2703	46.7297	2α, 2β
81	70	Glc1α	EtOH	TfOH	Toluene	68.4	53.6508	46.3492	2α, 2β
82	-50	Glc1α	tBuOH	TfOH	Toluene	43	69.3252	30.6748	4α, 4β
83	-30	Glc1α	tBuOH	TfOH	Toluene	64.7	74.1647	25.8353	4α, 4β
84	-10	Glc1α	tBuOH	TfOH	Toluene	83.7	75.069	24.931	4α, 4β
85	10	Glc1α	tBuOH	TfOH	Toluene	82.8	74.6673	25.3327	4α, 4β
86	30	Glc1α	tBuOH	TfOH	Toluene	78.5	72.2639	27.7361	4α, 4β
87	50	Glc1α	tBuOH	TfOH	Toluene	75.7	68.919	31.081	4α, 4β
88	70	Glc1α	tBuOH	TfOH	Toluene	67.5	65.1847	34.8153	4α, 4β
89	-30	Glc1α	iPrOH	TfOH	ACN	79.7	9.50728	90.4927	3α, 3β
90	-10	Glc1α	iPrOH	TfOH	ACN	74.1	13.9877	86.0123	3α, 3β
91	10	Glc1α	iPrOH	TfOH	ACN	71.4	21.7172	78.2828	3α, 3β
92	30	Glc1α	iPrOH	TfOH	ACN	75.9	25.1319	74.8681	3α, 3β
93	50	Glc1α	iPrOH	TfOH	ACN	78.4	30.9846	69.0154	3α, 3β
94	70	Glc1α	iPrOH	TfOH	ACN	76.9	41.7966	58.2034	3α, 3β
95	-50	Glc1α	iPrOH	TfOH	MTBE	70.5	84.7044	15.2956	3α, 3β
96	-30	Glc1α	iPrOH	TfOH	MTBE	72.4	89.4627	10.5373	3α, 3β
97	-10	Glc1α	iPrOH	TfOH	MTBE	67.7	87.6109	12.3891	3α, 3β
98	10	Glc1α	iPrOH	TfOH	MTBE	80.6	88.2333	11.7667	3α, 3β
99	30	Glc1α	iPrOH	TfOH	MTBE	65.2	84.9555	15.0445	3α, 3β
100	50	Glc1α	iPrOH	TfOH	MTBE	57.3	82.3659	17.6341	3α, 3β
101	-50	Glc1β	iPrOH	TfOH	MTBE	14.4955	95.5397	4.46033	3α, 3β
102	-30	Glc1β	iPrOH	TfOH	MTBE	55.6206	93.3328	6.66719	3α, 3β
103	-10	Glc1β	iPrOH	TfOH	MTBE	54.5727	92.5974	7.4026	3α, 3β
104	10	Glc1β	iPrOH	TfOH	MTBE	59.9713	89.6647	10.3353	3α, 3β
105	30	Glc1β	iPrOH	TfOH	MTBE	56.8966	87.6124	12.3876	3α, 3β
106	50	Glc1β	iPrOH	TfOH	MTBE	47.479	85.3571	14.6429	3α, 3β
107	-50	Gal1α	MeOH	TfOH	DCM	98	14.261	85.739	5α, 5β
108	-30	Gal1α	MeOH	TfOH	DCM	92.4	30.3518	69.6482	5α, 5β
109	-10	Gal1α	MeOH	TfOH	DCM	96.5	42.114	57.886	5α, 5β
110	10	Gal1α	MeOH	TfOH	DCM	96.8	52.7328	47.2672	5α, 5β
111	20	Gal1α	MeOH	TfOH	DCM	94.1	55.5762	44.4238	5α, 5β
112	30	Gal1α	MeOH	TfOH	DCM	95.2	59.5142	40.4858	5α, 5β
113	-50	Gal1α	EtOH	TfOH	DCM	92.4	10.7367	89.2633	6α, 6β
114	-30	Gal1α	EtOH	TfOH	DCM	98.3	21.883	78.117	6α, 6β
115	-10	Gal1α	EtOH	TfOH	DCM	99	34.4891	65.5109	6α, 6β
116	10	Gal1α	EtOH	TfOH	DCM	96.6	44	56	6α, 6β
117	20	Gal1α	EtOH	TfOH	DCM	98.2	47.8595	52.1405	6α, 6β
118	30	Gal1α	EtOH	TfOH	DCM	98.2	50.9471	49.0529	6α, 6β
119	-50	Gal1α	iPrOH	TfOH	DCM	98.2	19.2807	80.7193	7α, 7β
120	-30	Gal1α	iPrOH	TfOH	DCM	99.7	29.6481	70.3519	7α, 7β
121	-10	Gal1α	iPrOH	TfOH	DCM	96.4	41	59	7α, 7β
122	10	Gal1α	iPrOH	TfOH	DCM	96.9	46.4073	53.5927	7α, 7β
123	20	Gal1α	iPrOH	TfOH	DCM	95	49.2923	50.7077	7α, 7β
124	30	Gal1α	iPrOH	TfOH	DCM	78	51.3681	48.6319	7α, 7β
125	-50	Gal1α	tBuOH	TfOH	DCM	51.7	36.1	63.9	8α, 8β
126	-30	Gal1α	tBuOH	TfOH	DCM	99.4	40.3	59.7	8α, 8β
127	-10	Gal1α	tBuOH	TfOH	DCM	100	45.6	54.4	8α, 8β
128	10	Gal1α	tBuOH	TfOH	DCM	82.5	50.2	49.8	8α, 8β
129	20	Gal1α	tBuOH	TfOH	DCM	77.9	54.7	45.3	8α, 8β
130	30	Gal1α	tBuOH	TfOH	DCM	74.1	57.2	42.8	8α, 8β
131	-30	Gal2β	iPrOH	TfOH	DCM	15.9	38.5502	61.4498	7α, 7β
132	-10	Gal2β	iPrOH	TfOH	DCM	87.1	42.0893	57.9107	7α, 7β
133	10	Gal2β	iPrOH	TfOH	DCM	75.3	45.6272	54.3728	7α, 7β
134	20	Gal2β	iPrOH	TfOH	DCM	76.6	50.2249	49.7751	7α, 7β
135	30	Gal2β	iPrOH	TfOH	DCM	78.6	52.8005	47.1995	7α, 7β
136	-50	Gal1α	2F-EtOH	TfOH	DCM	76.8	62.6334	37.3666	9α, 9β
137	-30	Gal1α	2F-EtOH	TfOH	DCM	78.3	72.7147	27.2853	9α, 9β
138	-10	Gal1α	2F-EtOH	TfOH	DCM	83.3	70.552	29.448	9α, 9β
139	10	Gal1α	2F-EtOH	TfOH	DCM	84.1	71.3489	28.6511	9α, 9β
140	20	Gal1α	2F-EtOH	TfOH	DCM	93.5	70.8226	29.1774	9α, 9β
141	30	Gal1α	2F-EtOH	TfOH	DCM	86	70.7222	29.2778	9α, 9β
142	-50	Gal1α	iPrOH	TfOH	Toluene	96.7	10.3	89.7	7α, 7β
143	-30	Gal1α	iPrOH	TfOH	Toluene	93.1	14.7	85.3	7α, 7β
144	-10	Gal1α	iPrOH	TfOH	Toluene	95.6	27	73	7α, 7β
145	10	Gal1α	iPrOH	TfOH	Toluene	96.7	41.5	58.5	7α, 7β
146	30	Gal1α	iPrOH	TfOH	Toluene	90.6	57.3	42.7	7α, 7β
147	50	Gal1α	iPrOH	TfOH	Toluene	85.6	66.5	33.5	7α, 7β
148	70	Gal1α	iPrOH	TfOH	Toluene	77	68.9	31.1	7α, 7β
149	-50	Gal1α	iPrOH	TfOH	MTBE	39.6	43.6306	56.3694	7α, 7β
150	-30	Gal1α	iPrOH	TfOH	MTBE	63.5	55.8983	44.1017	7α, 7β
151	-10	Gal1α	iPrOH	TfOH	MTBE	85.3	67.0524	32.9476	7α, 7β
152	10	Gal1α	iPrOH	TfOH	MTBE	86.2	72.0162	27.9838	7α, 7β
153	30	Gal1α	iPrOH	TfOH	MTBE	81.5	75.9517	24.0483	7α, 7β
154	50	Gal1α	iPrOH	TfOH	MTBE	79.9	77.758	22.242	7α, 7β
155	-30	Gal1α	iPrOH	TfOH	ACN	29.8	16.1016	83.8984	7α, 7β
156	-10	Gal1α	iPrOH	TfOH	ACN	73.1	22.0485	77.9515	7α, 7β
157	10	Gal1α	iPrOH	TfOH	ACN	73.4	24.9388	75.0612	7α, 7β
158	30	Gal1α	iPrOH	TfOH	ACN	74.7	29.0828	70.9172	7α, 7β
159	50	Gal1α	iPrOH	TfOH	ACN	69.8	34.5914	65.4086	7α, 7β
160	70	Gal1α	iPrOH	TfOH	ACN	63.9	38.6044	61.3956	7α, 7β
161	-50	Man1α	MeOH	TfOH	DCM	96.8	50.5771	49.4229	10α, 10β
162	-30	Man1α	MeOH	TfOH	DCM	96	54.1425	45.8575	10α, 10β
163	-10	Man1α	MeOH	TfOH	DCM	97.5	57.41	42.59	10α, 10β
164	10	Man1α	MeOH	TfOH	DCM	92.1	59.5573	40.4427	10α, 10β
165	20	Man1α	MeOH	TfOH	DCM	75.5	64.1239	35.8761	10α, 10β
166	30	Man1α	MeOH	TfOH	DCM	86.7	64.7	35.3	10α, 10β
167	-50	Man1α	EtOH	TfOH	DCM	99.8	47.8976	52.1024	11α, 11β
168	-30	Man1α	EtOH	TfOH	DCM	97.3	53.1121	46.8879	11α, 11β
169	-10	Man1α	EtOH	TfOH	DCM	93.8	56.5112	43.4888	11α, 11β
170	10	Man1α	EtOH	TfOH	DCM	91.9	59.3833	40.6167	11α, 11β
171	20	Man1α	EtOH	TfOH	DCM	92.1	59.5349	40.4651	11α, 11β
172	30	Man1α	EtOH	TfOH	DCM	90	59.2594	40.7406	11α, 11β
173	-50	Man1α	iPrOH	TfOH	DCM	98.1	49.9398	50.0602	12α, 12β
174	-30	Man1α	iPrOH	TfOH	DCM	95.8	53.1121	46.8879	12α, 12β
175	-10	Man1α	iPrOH	TfOH	DCM	99.1	56.5112	43.4888	12α, 12β
176	10	Man1α	iPrOH	TfOH	DCM	99	59.3833	40.6167	12α, 12β
177	20	Man1α	iPrOH	TfOH	DCM	98.7	59.5349	40.4651	12α, 12β
178	30	Man1α	iPrOH	TfOH	DCM	93.9	64.9324	35.0676	12α, 12β
179	-50	Man1α	tBuOH	TfOH	DCM	99.4	55.3419	44.6581	13α, 13β
180	-30	Man1α	tBuOH	TfOH	DCM	92.7	57.5781	42.4219	13α, 13β
181	-10	Man1α	tBuOH	TfOH	DCM	81	61.5397	38.4603	13α, 13β
182	10	Man1α	tBuOH	TfOH	DCM	78.6	66.0642	33.9358	13α, 13β
183	20	Man1α	tBuOH	TfOH	DCM	78.3	74.9256	25.0744	13α, 13β
184	30	Man1α	tBuOH	TfOH	DCM	74.9	94.6	5.4	13α, 13β
185	-50	Man1α	tBuOH	FSO3H	DCM	96.4	55.0004	44.9996	13α, 13β
186	-30	Man1α	tBuOH	FSO3H	DCM	96.5	57.3664	42.6336	13α, 13β
187	-10	Man1α	tBuOH	FSO3H	DCM	94.6	57.7864	42.2136	13α, 13β
188	10	Man1α	tBuOH	FSO3H	DCM	90.7	59.2175	40.7825	13α, 13β
189	30	Man1α	tBuOH	FSO3H	DCM	100	61.3071	38.6929	13α, 13β
190	-50	Man1α	tBuOH	MsOH	DCM	50.2	57.5042	42.4958	13α, 13β
191	-30	Man1α	tBuOH	MsOH	DCM	50.4	60.213	39.787	13α, 13β
192	-10	Man1α	tBuOH	MsOH	DCM	50.1	61.2128	38.7872	13α, 13β
193	10	Man1α	tBuOH	MsOH	DCM	51.6	63.2664	36.7336	13α, 13β
194	30	Man1α	tBuOH	MsOH	DCM	49.7	63.5696	36.4304	13α, 13β
195	-40	Man1α	tBuOH	Tf2NH	DCM	67.7	55.4741	44.5259	13α, 13β
196	-30	Man1α	tBuOH	Tf2NH	DCM	81.4	55.0976	44.9024	13α, 13β
197	-10	Man1α	tBuOH	Tf2NH	DCM	65.3	62.2864	37.7136	13α, 13β
198	-5	Man1α	tBuOH	Tf2NH	DCM	65.4	71.4098	28.5902	13α, 13β
199	5	Man1α	tBuOH	Tf2NH	DCM	61.8	93.6897	6.31031	13α, 13β
200	10	Man1α	tBuOH	Tf2NH	DCM	61.3	97.6902	2.30978	13α, 13β
201	20	Man1α	tBuOH	Tf2NH	DCM	56.8	97.3276	2.67243	13α, 13β
202	30	Man1α	tBuOH	Tf2NH	DCM	45.9	97.6098	2.39025	13α, 13β
203	-50	Man1α	EtOH	Tf2NH	DCM	74.3	54.7977	45.2023	11α, 11β
204	-30	Man1α	EtOH	Tf2NH	DCM	70.5	56.9865	43.0135	11α, 11β
205	-10	Man1α	EtOH	Tf2NH	DCM	69.1	57.023	42.977	11α, 11β
206	10	Man1α	EtOH	Tf2NH	DCM	66.7	61.6873	38.3127	11α, 11β
207	30	Man1α	EtOH	Tf2NH	DCM	45.4	62.259	37.741	11α, 11β
208	-10	Man2α	iPrOH	TfOH	DCM	21.7	53.7593	46.2407	12α, 12β
209	10	Man2α	iPrOH	TfOH	DCM	67.9	56.9689	43.0311	12α, 12β
210	20	Man2α	iPrOH	TfOH	DCM	73.6	57.4715	42.5285	12α, 12β
211	30	Man2α	iPrOH	TfOH	DCM	76	57.9811	42.0189	12α, 12β
212	-50	Man1α	iPrOH	TfOH	Toluene	67.8	61.2266	38.7734	12α, 12β
213	-30	Man1α	iPrOH	TfOH	Toluene	98.1	63.8061	36.1939	12α, 12β
214	-10	Man1α	iPrOH	TfOH	Toluene	100	66.6538	33.3462	12α, 12β
215	10	Man1α	iPrOH	TfOH	Toluene	95.2	70.226	29.774	12α, 12β
216	30	Man1α	iPrOH	TfOH	Toluene	94.7	74.427	25.573	12α, 12β
217	50	Man1α	iPrOH	TfOH	Toluene	90.5	78.4929	21.5071	12α, 12β
218	70	Man1α	iPrOH	TfOH	Toluene	77.7	87.1314	12.8686	12α, 12β
219	-30	Man1α	iPrOH	TfOH	ACN	70.8	64.9425	35.0575	12α, 12β
220	-10	Man1α	iPrOH	TfOH	ACN	70.5	65.8595	34.1405	12α, 12β
221	10	Man1α	iPrOH	TfOH	ACN	69.4	74.3968	25.6032	12α, 12β
222	20	Man1α	iPrOH	TfOH	ACN	68.5	91.29	8.71001	12α, 12β
223	30	Man1α	iPrOH	TfOH	ACN	79.1	97.1401	2.85993	12α, 12β
224	50	Man1α	iPrOH	TfOH	ACN	75.5	98.5569	1.44306	12α, 12β
225	70	Man1α	iPrOH	TfOH	ACN	70.7	98.2035	1.79654	12α, 12β
226	-50	Man1α	iPrOH	TfOH	MTBE	44.6	71.9502	28.0498	12α, 12β
227	-30	Man1α	iPrOH	TfOH	MTBE	46.7	75.1265	24.8735	12α, 12β
228	-10	Man1α	iPrOH	TfOH	MTBE	65.9	76.3978	23.6022	12α, 12β
229	10	Man1α	iPrOH	TfOH	MTBE	55.2	79.5703	20.4297	12α, 12β
230	30	Man1α	iPrOH	TfOH	MTBE	54.6	81.6126	18.3874	12α, 12β
231	50	Man1α	iPrOH	TfOH	MTBE	51.7	83.9183	16.0817	12α, 12β
232	-50	Man1α	3F-EtOH	TfOH	DCM	95.5	100	0	14α
233	-30	Man1α	3F-EtOH	TfOH	DCM	99.4	100	0	14α
234	-10	Man1α	3F-EtOH	TfOH	DCM	91.1	100	0	14α
235	10	Man1α	3F-EtOH	TfOH	DCM	91.8	100	0	14α
236	20	Man1α	3F-EtOH	TfOH	DCM	93.1	100	0	14α
237	30	Man1α	3F-EtOH	TfOH	DCM	92.7	100	0	14α
238	-30	Gal1α	iPrOH	TfOH	Anisole	61.9	65.4	34.6	7α, 7β
239	-10	Gal1α	iPrOH	TfOH	Anisole	68	58.2	41.8	7α, 7β
240	10	Gal1α	iPrOH	TfOH	Anisole	65.9	61.6	38.4	7α, 7β
241	30	Gal1α	iPrOH	TfOH	Anisole	62.5	65.5	34.5	7α, 7β
242	50	Gal1α	iPrOH	TfOH	Anisole	52.2	69.1	30.9	7α, 7β
243	70	Gal1α	iPrOH	TfOH	Anisole	43.5	70.2	29.8	7α, 7β
244	-30	Man1α	iPrOH	TfOH	Anisole	94.5	57.7889	42.2111	12α, 12β
245	-10	Man1α	iPrOH	TfOH	Anisole	85.3	61.3283	38.6717	12α, 12β
246	10	Man1α	iPrOH	TfOH	Anisole	71.9	64.4824	35.5176	12α, 12β
247	30	Man1α	iPrOH	TfOH	Anisole	54.4	66.3238	33.6762	12α, 12β
248	50	Man1α	iPrOH	TfOH	Anisole	51	66.2335	33.7665	12α, 12β
249	70	Man1α	iPrOH	TfOH	Anisole	60.3	49.07	50.93	12α, 12β
250	-50	Glc1α	iPrOH	TfOH	tBu-Benzene	59.5	17.4	82.6	3α, 3β
251	-30	Glc1α	iPrOH	TfOH	tBu-Benzene	67.7	25.9	74.1	3α, 3β
252	-10	Glc1α	iPrOH	TfOH	tBu-Benzene	98.9	39.6	60.4	3α, 3β
253	10	Glc1α	iPrOH	TfOH	tBu-Benzene	96.9	47.2	52.8	3α, 3β
254	30	Glc1α	iPrOH	TfOH	tBu-Benzene	95.3	54	46	3α, 3β
255	50	Glc1α	iPrOH	TfOH	tBu-Benzene	79	58.2	41.8	3α, 3β
256	70	Glc1α	iPrOH	TfOH	tBu-Benzene	77	60.1	39.9	3α, 3β
257	-50	Glc1α	iPrOH	TfOH	Chloroform	67.1155	37.4	62.6	3α, 3β
258	-30	Glc1α	iPrOH	TfOH	Chloroform	86.5681	47.5	52.5	3α, 3β
259	-10	Glc1α	iPrOH	TfOH	Chloroform	89.4734	58.1	41.9	3α, 3β
260	10	Glc1α	iPrOH	TfOH	Chloroform	97.9454	64.3	35.7	3α, 3β
261	30	Glc1α	iPrOH	TfOH	Chloroform	96.3213	70.2	29.8	3α, 3β
262	50	Glc1α	iPrOH	TfOH	Chloroform	93.1101	72.9	27.1	3α, 3β
263	-50	Glc1β	iPrOH	TfOH	Chloroform	72.7494	37.5728	62.4272	3α, 3β
264	-30	Glc1β	iPrOH	TfOH	Chloroform	81.1623	46.1788	53.8212	3α, 3β
265	-10	Glc1β	iPrOH	TfOH	Chloroform	88.6486	54.5718	45.4282	3α, 3β
266	10	Glc1β	iPrOH	TfOH	Chloroform	84.2862	62.8551	37.1449	3α, 3β
267	30	Glc1β	iPrOH	TfOH	Chloroform	88.2661	67.2651	32.7349	3α, 3β
268	50	Glc1β	iPrOH	TfOH	Chloroform	89.0581	72.9984	27.0016	3α, 3β
269	-30	Glc3α	iPrOH	TMSOTf	DCM	29.5	31.3	68.7	3α, 3β
270	-10	Glc3α	iPrOH	TMSOTf	DCM	60.1	44.7	55.3	3α, 3β
271	10	Glc3α	iPrOH	TMSOTf	DCM	79.1	53.2	46.8	3α, 3β
272	20	Glc3α	iPrOH	TMSOTf	DCM	90.4	57.9	42.1	3α, 3β
273	30	Glc3α	iPrOH	TMSOTf	DCM	98.6	61.5	38.5	3α, 3β
274	-30	Gal3α	iPrOH	TMSOTf	DCM	33.9	34.3	65.7	7α, 7β
275	-10	Gal3α	iPrOH	TMSOTf	DCM	49.2	41.5	58.5	7α, 7β
276	10	Gal3α	iPrOH	TMSOTf	DCM	79.2	47.3	52.7	7α, 7β
277	20	Gal3α	iPrOH	TMSOTf	DCM	93.1	50.1	49.9	7α, 7β
278	30	Gal3α	iPrOH	TMSOTf	DCM	98.1	52.7	47.3	7α, 7β
279	20	Man3α	iPrOH	TMSOTf	DCM	37.5	63.9	36.1	12α, 12β
280	30	Man3α	iPrOH	TMSOTf	DCM	81.1	62.1	37.9	12α, 12β
281	-50	Fuc1α	iPrOH	TfOH	DCM	71.6536	19.9	80.1	15α, 15β
282	-30	Fuc1α	iPrOH	TfOH	DCM	69.4234	30	70	15α, 15β
283	-10	Fuc1α	iPrOH	TfOH	DCM	71.8318	33.6	66.4	15α, 15β
284	10	Fuc1α	iPrOH	TfOH	DCM	56.2684	39.7	60.3	15α, 15β
285	-50	Gal1α	ManOH	TfOH	DCM	95.3551	48.9	51.1	16α, 16β
286	-30	Gal1α	ManOH	TfOH	DCM	92.0496	56.5	43.5	16α, 16β
287	-10	Gal1α	ManOH	TfOH	DCM	84.0518	61.5	38.5	16α, 16β
288	10	Gal1α	ManOH	TfOH	DCM	82.9439	65.7	34.3	16α, 16β
289	30	Gal1α	ManOH	TfOH	DCM	76.239	69.7	30.3	16α, 16β
290	-50	Gal1α	GlcOH	TfOH	DCM	98.1392	42.4	57.6	17α, 17β
291	-30	Gal1α	GlcOH	TfOH	DCM	93.5723	51.9	48.1	17α, 17β
292	-10	Gal1α	GlcOH	TfOH	DCM	94.0655	62.6	37.4	17α, 17β
293	10	Gal1α	GlcOH	TfOH	DCM	93.2433	67.1	32.9	17α, 17β
294	20	Gal1α	GlcOH	TfOH	DCM	88.1058	69.2	30.8	17α, 17β
295	30	Gal1α	GlcOH	TfOH	DCM	93.1716	71.9	28.1	17α, 17β
296	-50	Gal1α	iPrOH	C3F6S2O4NH	DCM	32.9886	18.4853	81.5147	7α, 7β
297	-30	Gal1α	iPrOH	C3F6S2O4NH	DCM	37.4345	26.1818	73.8182	7α, 7β
298	-10	Gal1α	iPrOH	C3F6S2O4NH	DCM	36.0304	32.5866	67.4134	7α, 7β
299	10	Gal1α	iPrOH	C3F6S2O4NH	DCM	45.0031	40.9723	59.0277	7α, 7β
300	30	Gal1α	iPrOH	C3F6S2O4NH	DCM	59.6231	47.1142	52.8858	7α, 7β
301	-50	Man1α	tBuOH	C3F6S2O4NH	DCM	71.8706	36.7	63.3	13α, 13β
302	-30	Man1α	tBuOH	C3F6S2O4NH	DCM	69.5524	42.8	57.2	13α, 13β
303	-10	Man1α	tBuOH	C3F6S2O4NH	DCM	86.2612	48.2	51.8	13α, 13β
304	10	Man1α	tBuOH	C3F6S2O4NH	DCM	87.4794	64.4	35.6	13α, 13β
305	30	Man1α	tBuOH	C3F6S2O4NH	DCM	91.6885	98	2	13α, 13β
306	-20	Glc1α	iPrOH	TfOH	3F-Toluene	85.5041	31.7	68.3	3α, 3β
307	10	Glc1α	iPrOH	TfOH	3F-Toluene	96.8148	51.8	48.2	3α, 3β
308	30	Glc1α	iPrOH	TfOH	3F-Toluene	97.5429	60.3	39.7	3α, 3β
309	50	Glc1α	iPrOH	TfOH	3F-Toluene	85.4797	61.9	38.1	3α, 3β
310	70	Glc1α	iPrOH	TfOH	3F-Toluene	82.1637	64.4	35.6	3α, 3β
311	90	Glc1α	iPrOH	TfOH	3F-Toluene	60.2304	63.3	36.7	3α, 3β
312	20	Gal1α	iPrOH	TfOH	1,4-Dioxane	99.2312	67.9276	32.0724	7α, 7β
313	40	Gal1α	iPrOH	TfOH	1,4-Dioxane	96.0119	71.3382	28.6618	7α, 7β
314	60	Gal1α	iPrOH	TfOH	1,4-Dioxane	89.5816	73.0578	26.9422	7α, 7β
315	80	Gal1α	iPrOH	TfOH	1,4-Dioxane	82.281	73.9154	26.0846	7α, 7β
316	100	Gal1α	iPrOH	TfOH	1,4-Dioxane	80.3389	74.2431	25.7569	7α, 7β
317	-50	Glc1β	EtOH	TfOH	Toluene	83.2341	31.4024	68.5976	2α, 2β
318	-30	Glc1β	EtOH	TfOH	Toluene	86.5832	37.0644	62.9356	2α, 2β
319	-10	Glc1β	EtOH	TfOH	Toluene	85.4575	46.706	53.294	2α, 2β
320	10	Glc1β	EtOH	TfOH	Toluene	82.7084	54.7003	45.2997	2α, 2β
321	30	Glc1β	EtOH	TfOH	Toluene	78.158	60.7833	39.2167	2α, 2β
322	50	Glc1β	EtOH	TfOH	Toluene	75.9925	60.586	39.414	2α, 2β
323	70	Glc1β	EtOH	TfOH	Toluene	73.8373	63.2041	36.7959	2α, 2β
324	-50	Glc1β	tBuOH	TfOH	Toluene	68.6288	79.6	20.4	4α, 4β
325	-30	Glc1β	tBuOH	TfOH	Toluene	89.1373	78.6	21.4	4α, 4β
326	-10	Glc1β	tBuOH	TfOH	Toluene	99.0646	76.6	23.4	4α, 4β
327	10	Glc1β	tBuOH	TfOH	Toluene	94.9939	74.1	25.9	4α, 4β
328	30	Glc1β	tBuOH	TfOH	Toluene	90.1268	71.2	28.8	4α, 4β
329	50	Glc1β	tBuOH	TfOH	Toluene	84.5501	68.5	31.5	4α, 4β
330	70	Glc1β	tBuOH	TfOH	Toluene	74.2517	65.1	34.9	4α, 4β
331	-50	Gal1β	iPrOH	TfOH	DCM	99.4	23.3808	76.6192	7α, 7β
332	-30	Gal1β	iPrOH	TfOH	DCM	99.9	32.4163	67.5837	7α, 7β
333	-10	Gal1β	iPrOH	TfOH	DCM	93.8	39.7188	60.2812	7α, 7β
334	10	Gal1β	iPrOH	TfOH	DCM	81.6	47.1801	52.8199	7α, 7β
335	30	Gal1β	iPrOH	TfOH	DCM	75.6	55.0491	44.9509	7α, 7β
336	-50	Gal1β	iPrOH	TfOH	Toluene	80.5934	33.0259	66.9741	7α, 7β
337	-30	Gal1β	iPrOH	TfOH	Toluene	96.4461	34.324	65.676	7α, 7β
338	-10	Gal1β	iPrOH	TfOH	Toluene	96.7505	39.9309	60.0691	7α, 7β
339	10	Gal1β	iPrOH	TfOH	Toluene	93.1926	47.2864	52.7136	7α, 7β
340	30	Gal1β	iPrOH	TfOH	Toluene	94.1201	56.317	43.683	7α, 7β
341	50	Gal1β	iPrOH	TfOH	Toluene	90.8492	62.7115	37.2885	7α, 7β
342	70	Gal1β	iPrOH	TfOH	Toluene	87.3415	68.6102	31.3898	7α, 7β

## Sheet: Donor
Donor	Don C1	Don H1-H2 j	Don H2-H3 j	Don H3-H4 j	Don H4-H5 j
Glu a imi	98.357	3.39	9.6	9.14	9.65
Glu b imi	103.043	7.8	8.67	8.85	9.74
Glu b set	81.354	9.5	9.41	8.42	9.54
Gal a imi	100.581	3.46	10.25	2.84	0.98
Gal b imi	102.96	7.9	9.72	3.35	1.1
Gal b set	84.093	9.19	7.88	5.31	1.93
Man a imi	99.895	2.51	3.42	9.43	9.68
Man a set	86.109	0.97	5.15	8	9.36
Fuc a imi	102.907	3.68	9.28	5.02	2.24

## Sheet: Acceptor
Acceptor	Acc O chem shift	Acc O exposed area	Acc aC exposed area	Acc O electrostatic	Acc O mulliken	Acc O natural	Acc IR Peak	Acc Lowdin Bond Order	Acc Mulliken Bond Order	Acc aC electrostatic	Acc aC mulliken	Acc aC natural	Acc aC chem shift
MeOH	322.409	12.136	24.304	-0.581	-0.561	-0.709	3794	0.913	0.814	-0.154	-0.397	-0.177	53.816
EtOH	292.11	11.811	14.908	-0.609	-0.567	-0.729	3780	0.909	0.812	0.245	-0.172	0.003	63.719
iPrOH	253.13	11.64	7.066	-0.685	-0.562	-0.739	3773	0.907	0.812	0.708	0.007	0.162	70.437
tBuOH	228.836	11.327	1.196	-0.743	-0.561	-0.749	3760	0.906	0.811	1.124	0.133	0.321	74.443
2F-EtOH	324.373	11.999	14.469	-0.563	-0.542	-0.705	3768	0.898	0.794	-0.04	-0.236	-0.073	67.536
3F-EtOH	314.757	11.907	14.32	-0.557	-0.535	-0.701	3773	0.899	0.795	-0.12	-0.305	-0.097	66.664
Glu-OH	304.638	11.797	13.355	-0.65	-0.573	-0.725	3801	0.91	0.81	-0.136	-0.161	-0.013	68.979
Man-OH	306.933	11.134	13.276	-0.594	-0.575	-0.734	3804	0.9	0.8	-0.108	-0.191	-0.014	66.669
Gal-OH	314.324	11.509	13.379	-0.65	-0.58	-0.736	3820	0.91	0.81	-0.115	-0.189	-0.009	65.827
Ara-OH	299.922	12.107	13.724	-0.583	-0.558	-0.72	3762	0.9	0.79	-0.078	-0.155	-0.016	70.195

## Sheet: Activator
Activator	Act CB HOMO	Act Mulliken bond order	Act bond length	Act O/N electrostatic	Act H electrostatic	Act IR peak	Act H NMR
TfOH	-2.48	0.88	0.969	-0.594	0.467	3741	4.643
Tf2NH	-4.06	0.86	1.015	-0.621	0.37	3564	5.124
FSO3H	-2.36	0.88	0.971	-0.595	0.472	3720	5.166
MsOH	-1.54	0.89	0.969	-0.656	0.459	3745	4.444
C3F6S2O4NH	-4.07	0.82	1.016	-0.68	0.386	3554	5.572

## Sheet: Solvent
Solvent	m.p	b.p	Polarity	Donicity	Dipole moment	HOMO	LUMO	Area	PSA	Volume	Ovality	E_Min	E_Max	Log P	Polarizability
DCM	-96.7	39.6	0.309	1	1.87	-8.65	-0.73	84.21	0	61.24	1.12	-62.13	146.58	1.01	44.47
Toluene	-95	111	0.099	0.1	0.32	-6.64	-0.18	134.86	0	117.38	1.16	-95.18	69.25	2.52	49.32
ACN	-44	81.3	0.46	14.1	3.86	-9.14	0.72	73.41	15.278	53.06	1.08	-191.22	136.7	0.67	43.34
MTBE	-109	55.2	0.124		1.23	-6.89	1.01	139.63	6.748	115.42	1.22	-170.72	59.82	0.96	48.87
3F-Toluene	-29	101	0.241		2.88	-7.52	-1.07	150.61	0	131.17	1.21	-79.32	105.79	2.96	50.49
Chloroform	-63.5	61.15	0.259	4	1.25	-8.81	-1.57	100.4	0	75.22	1.17	-37.44	170.92	1.67	45.76
tBu-Benzene	-58	169			0.27	-6.65	-0.2	187.27	0	170.86	1.26	-94.82	74.38	3.74	53.71
Dioxane	11.8	101.1	0.164	14.8	0	-6.61	1.34	113.55	15.79	94.03	1.14	-156.08	75.7	-0.31	47.13
Anisole	-37	154	0.198	9	1.36	-6.09	-0.21	144.68	6.908	126.19	1.19	-126.36	92.35	1.91	50.22
Nitromethane	-28.38	101.19	0.481	2.7	3.52	-8.24	3.52	79.6	40.793	55.28	1.13	-149.4	153.62	-1.37	44.4
tBu-Phosphate	-80	289	0.253	23.7	1.23	-7.76	1.06	348.19	41.729	293.73	1.63	-222.88	60.84		63.12
DMF	-60.5	152	0.386	26.6	3.9	-6.78	0.63	110.67	15.066	86.32	1.17	-210.6	110.76	-0.75	46.63
