# Supplementary material for: Predicting glycosylation stereoselectivity using machine learning
Source: Chem Sci. 2020 Dec 26;12(8):2931–9. doi: 10.1039/d0sc06222g (PMC8179398; doi:10.1039/d0sc06222g)
Supplement: SC-012-D0SC06222G-s004 [file SC-012-D0SC06222G-s004.xlsx]

## Sheet: Sheet1
a	Temperature (°C)	Don C1	C2	C4	Acc O chem shift	Acc O exposed area	Acc aC exposed area	Act CB HOMO	Act CB exposed area	Sol E_Min	Sol E_Max
29.6438	-50	98.357	0	0	322.409	12.136	24.304	-2.48	17.736	-62.13	146.58
32.5074	-30	98.357	0	0	322.409	12.136	24.304	-2.48	17.736	-62.13	146.58
38.6508	-10	98.357	0	0	322.409	12.136	24.304	-2.48	17.736	-62.13	146.58
46.4643	10	98.357	0	0	322.409	12.136	24.304	-2.48	17.736	-62.13	146.58
48.7227	20	98.357	0	0	322.409	12.136	24.304	-2.48	17.736	-62.13	146.58
52.6092	30	98.357	0	0	322.409	12.136	24.304	-2.48	17.736	-62.13	146.58
15.5482	-50	98.357	0	0	292.11	11.811	14.908	-2.48	17.736	-62.13	146.58
29.4399	-30	98.357	0	0	292.11	11.811	14.908	-2.48	17.736	-62.13	146.58
36.012	-10	98.357	0	0	292.11	11.811	14.908	-2.48	17.736	-62.13	146.58
46.1629	10	98.357	0	0	292.11	11.811	14.908	-2.48	17.736	-62.13	146.58
50.2004	20	98.357	0	0	292.11	11.811	14.908	-2.48	17.736	-62.13	146.58
55.5245	30	98.357	0	0	292.11	11.811	14.908	-2.48	17.736	-62.13	146.58
26.853	-50	98.357	0	0	253.13	11.64	7.066	-2.48	17.736	-62.13	146.58
38.8386	-30	98.357	0	0	253.13	11.64	7.066	-2.48	17.736	-62.13	146.58
46.7177	-10	98.357	0	0	253.13	11.64	7.066	-2.48	17.736	-62.13	146.58
52.5594	10	98.357	0	0	253.13	11.64	7.066	-2.48	17.736	-62.13	146.58
57.6877	20	98.357	0	0	253.13	11.64	7.066	-2.48	17.736	-62.13	146.58
60.9595	30	98.357	0	0	253.13	11.64	7.066	-2.48	17.736	-62.13	146.58
27.7251	-50	103.043	0	0	253.13	11.64	7.066	-2.48	17.736	-62.13	146.58
30.615	-45	103.043	0	0	253.13	11.64	7.066	-2.48	17.736	-62.13	146.58
32.6578	-40	103.043	0	0	253.13	11.64	7.066	-2.48	17.736	-62.13	146.58
34.4333	-35	103.043	0	0	253.13	11.64	7.066	-2.48	17.736	-62.13	146.58
36.69	-30	103.043	0	0	253.13	11.64	7.066	-2.48	17.736	-62.13	146.58
37.4372	-25	103.043	0	0	253.13	11.64	7.066	-2.48	17.736	-62.13	146.58
38.6412	-20	103.043	0	0	253.13	11.64	7.066	-2.48	17.736	-62.13	146.58
41.9307	-15	103.043	0	0	253.13	11.64	7.066	-2.48	17.736	-62.13	146.58
43.6636	-10	103.043	0	0	253.13	11.64	7.066	-2.48	17.736	-62.13	146.58
45.64	-5	103.043	0	0	253.13	11.64	7.066	-2.48	17.736	-62.13	146.58
50.5275	5	103.043	0	0	253.13	11.64	7.066	-2.48	17.736	-62.13	146.58
53.1965	10	103.043	0	0	253.13	11.64	7.066	-2.48	17.736	-62.13	146.58
55.0159	15	103.043	0	0	253.13	11.64	7.066	-2.48	17.736	-62.13	146.58
56.8046	20	103.043	0	0	253.13	11.64	7.066	-2.48	17.736	-62.13	146.58
58.2565	25	103.043	0	0	253.13	11.64	7.066	-2.48	17.736	-62.13	146.58
59.5994	30	103.043	0	0	253.13	11.64	7.066	-2.48	17.736	-62.13	146.58
38.1098	-50	98.357	0	0	228.836	11.327	1.196	-2.48	17.736	-62.13	146.58
44.798	-30	98.357	0	0	228.836	11.327	1.196	-2.48	17.736	-62.13	146.58
54.4709	-10	98.357	0	0	228.836	11.327	1.196	-2.48	17.736	-62.13	146.58
62.8031	10	98.357	0	0	228.836	11.327	1.196	-2.48	17.736	-62.13	146.58
66.7826	20	98.357	0	0	228.836	11.327	1.196	-2.48	17.736	-62.13	146.58
71.02	30	98.357	0	0	228.836	11.327	1.196	-2.48	17.736	-62.13	146.58
37.9711	-10	81.354	0	0	253.13	11.64	7.066	-2.48	17.736	-62.13	146.58
54.4854	10	81.354	0	0	253.13	11.64	7.066	-2.48	17.736	-62.13	146.58
57.5221	20	81.354	0	0	253.13	11.64	7.066	-2.48	17.736	-62.13	146.58
63.8368	30	81.354	0	0	253.13	11.64	7.066	-2.48	17.736	-62.13	146.58
6.10975	-50	98.357	0	0	228.836	11.327	1.196	-4.06	9.692	-62.13	146.58
16.7897	-30	98.357	0	0	228.836	11.327	1.196	-4.06	9.692	-62.13	146.58
35.2192	-10	98.357	0	0	228.836	11.327	1.196	-4.06	9.692	-62.13	146.58
47.8747	20	98.357	0	0	228.836	11.327	1.196	-4.06	9.692	-62.13	146.58
8.7	-50	98.357	0	0	253.13	11.64	7.066	-4.06	9.692	-62.13	146.58
16.4	-30	98.357	0	0	253.13	11.64	7.066	-4.06	9.692	-62.13	146.58
26.8	-10	98.357	0	0	253.13	11.64	7.066	-4.06	9.692	-62.13	146.58
42.1	10	98.357	0	0	253.13	11.64	7.066	-4.06	9.692	-62.13	146.58
47.5	20	98.357	0	0	253.13	11.64	7.066	-4.06	9.692	-62.13	146.58
55	30	98.357	0	0	253.13	11.64	7.066	-4.06	9.692	-62.13	146.58
5.81306	-50	98.357	0	0	292.11	11.811	14.908	-4.06	9.692	-62.13	146.58
10.4395	-30	98.357	0	0	292.11	11.811	14.908	-4.06	9.692	-62.13	146.58
19.6415	-10	98.357	0	0	292.11	11.811	14.908	-4.06	9.692	-62.13	146.58
33.5956	10	98.357	0	0	292.11	11.811	14.908	-4.06	9.692	-62.13	146.58
39.0023	20	98.357	0	0	292.11	11.811	14.908	-4.06	9.692	-62.13	146.58
44.993	30	98.357	0	0	292.11	11.811	14.908	-4.06	9.692	-62.13	146.58
19.1038	-50	98.357	0	0	253.13	11.64	7.066	-2.48	17.736	-95.18	69.25
35.5211	-30	98.357	0	0	253.13	11.64	7.066	-2.48	17.736	-95.18	69.25
49.9433	-10	98.357	0	0	253.13	11.64	7.066	-2.48	17.736	-95.18	69.25
61.5736	10	98.357	0	0	253.13	11.64	7.066	-2.48	17.736	-95.18	69.25
64.1316	30	98.357	0	0	253.13	11.64	7.066	-2.48	17.736	-95.18	69.25
63.8828	50	98.357	0	0	253.13	11.64	7.066	-2.48	17.736	-95.18	69.25
62.2943	70	98.357	0	0	253.13	11.64	7.066	-2.48	17.736	-95.18	69.25
60.8307	-50	103.043	0	0	253.13	11.64	7.066	-2.48	17.736	-95.18	69.25
60.3325	-30	103.043	0	0	253.13	11.64	7.066	-2.48	17.736	-95.18	69.25
62.2063	-10	103.043	0	0	253.13	11.64	7.066	-2.48	17.736	-95.18	69.25
65.576	10	103.043	0	0	253.13	11.64	7.066	-2.48	17.736	-95.18	69.25
63.2916	30	103.043	0	0	253.13	11.64	7.066	-2.48	17.736	-95.18	69.25
62.2451	50	103.043	0	0	253.13	11.64	7.066	-2.48	17.736	-95.18	69.25
61.23	70	103.043	0	0	253.13	11.64	7.066	-2.48	17.736	-95.18	69.25
9.9	-50	98.357	0	0	292.11	11.811	14.908	-2.48	17.736	-95.18	69.25
19.9765	-30	98.357	0	0	292.11	11.811	14.908	-2.48	17.736	-95.18	69.25
32.2209	-10	98.357	0	0	292.11	11.811	14.908	-2.48	17.736	-95.18	69.25
42.5362	10	98.357	0	0	292.11	11.811	14.908	-2.48	17.736	-95.18	69.25
49.5594	30	98.357	0	0	292.11	11.811	14.908	-2.48	17.736	-95.18	69.25
53.2703	50	98.357	0	0	292.11	11.811	14.908	-2.48	17.736	-95.18	69.25
53.6508	70	98.357	0	0	292.11	11.811	14.908	-2.48	17.736	-95.18	69.25
69.3252	-50	98.357	0	0	228.836	11.327	1.196	-2.48	17.736	-95.18	69.25
74.1647	-30	98.357	0	0	228.836	11.327	1.196	-2.48	17.736	-95.18	69.25
75.069	-10	98.357	0	0	228.836	11.327	1.196	-2.48	17.736	-95.18	69.25
74.6673	10	98.357	0	0	228.836	11.327	1.196	-2.48	17.736	-95.18	69.25
72.2639	30	98.357	0	0	228.836	11.327	1.196	-2.48	17.736	-95.18	69.25
68.919	50	98.357	0	0	228.836	11.327	1.196	-2.48	17.736	-95.18	69.25
65.1847	70	98.357	0	0	228.836	11.327	1.196	-2.48	17.736	-95.18	69.25
9.50728	-30	98.357	0	0	253.13	11.64	7.066	-2.48	17.736	-191.22	136.7
13.9877	-10	98.357	0	0	253.13	11.64	7.066	-2.48	17.736	-191.22	136.7
21.7172	10	98.357	0	0	253.13	11.64	7.066	-2.48	17.736	-191.22	136.7
25.1319	30	98.357	0	0	253.13	11.64	7.066	-2.48	17.736	-191.22	136.7
30.9846	50	98.357	0	0	253.13	11.64	7.066	-2.48	17.736	-191.22	136.7
41.7966	70	98.357	0	0	253.13	11.64	7.066	-2.48	17.736	-191.22	136.7
84.7044	-50	98.357	0	0	253.13	11.64	7.066	-2.48	17.736	-170.72	59.82
89.4627	-30	98.357	0	0	253.13	11.64	7.066	-2.48	17.736	-170.72	59.82
87.6109	-10	98.357	0	0	253.13	11.64	7.066	-2.48	17.736	-170.72	59.82
88.2333	10	98.357	0	0	253.13	11.64	7.066	-2.48	17.736	-170.72	59.82
84.9555	30	98.357	0	0	253.13	11.64	7.066	-2.48	17.736	-170.72	59.82
82.3659	50	98.357	0	0	253.13	11.64	7.066	-2.48	17.736	-170.72	59.82
95.5	-50	103.043	0	0	253.13	11.64	7.066	-2.48	17.736	-170.72	59.82
93.3	-30	103.043	0	0	253.13	11.64	7.066	-2.48	17.736	-170.72	59.82
92.6	-10	103.043	0	0	253.13	11.64	7.066	-2.48	17.736	-170.72	59.82
89.7	10	103.043	0	0	253.13	11.64	7.066	-2.48	17.736	-170.72	59.82
87.6	30	103.043	0	0	253.13	11.64	7.066	-2.48	17.736	-170.72	59.82
85.4	50	103.043	0	0	253.13	11.64	7.066	-2.48	17.736	-170.72	59.82
14.261	-50	100.581	0	1	322.409	12.136	24.304	-2.48	17.736	-62.13	146.58
30.3518	-30	100.581	0	1	322.409	12.136	24.304	-2.48	17.736	-62.13	146.58
42.114	-10	100.581	0	1	322.409	12.136	24.304	-2.48	17.736	-62.13	146.58
52.7328	10	100.581	0	1	322.409	12.136	24.304	-2.48	17.736	-62.13	146.58
55.5762	20	100.581	0	1	322.409	12.136	24.304	-2.48	17.736	-62.13	146.58
59.5142	30	100.581	0	1	322.409	12.136	24.304	-2.48	17.736	-62.13	146.58
10.7367	-50	100.581	0	1	292.11	11.811	14.908	-2.48	17.736	-62.13	146.58
21.883	-30	100.581	0	1	292.11	11.811	14.908	-2.48	17.736	-62.13	146.58
34.4891	-10	100.581	0	1	292.11	11.811	14.908	-2.48	17.736	-62.13	146.58
44	10	100.581	0	1	292.11	11.811	14.908	-2.48	17.736	-62.13	146.58
47.8595	20	100.581	0	1	292.11	11.811	14.908	-2.48	17.736	-62.13	146.58
50.9471	30	100.581	0	1	292.11	11.811	14.908	-2.48	17.736	-62.13	146.58
19.2807	-50	100.581	0	1	253.13	11.64	7.066	-2.48	17.736	-62.13	146.58
29.6481	-30	100.581	0	1	253.13	11.64	7.066	-2.48	17.736	-62.13	146.58
41	-10	100.581	0	1	253.13	11.64	7.066	-2.48	17.736	-62.13	146.58
46.4073	10	100.581	0	1	253.13	11.64	7.066	-2.48	17.736	-62.13	146.58
49.2923	20	100.581	0	1	253.13	11.64	7.066	-2.48	17.736	-62.13	146.58
51.3681	30	100.581	0	1	253.13	11.64	7.066	-2.48	17.736	-62.13	146.58
36.1	-50	100.581	0	1	228.836	11.327	1.196	-2.48	17.736	-62.13	146.58
40.3	-30	100.581	0	1	228.836	11.327	1.196	-2.48	17.736	-62.13	146.58
45.6	-10	100.581	0	1	228.836	11.327	1.196	-2.48	17.736	-62.13	146.58
50.2	10	100.581	0	1	228.836	11.327	1.196	-2.48	17.736	-62.13	146.58
54.7	20	100.581	0	1	228.836	11.327	1.196	-2.48	17.736	-62.13	146.58
57.2	30	100.581	0	1	228.836	11.327	1.196	-2.48	17.736	-62.13	146.58
38.5502	-30	84.093	0	1	253.13	11.64	7.066	-2.48	17.736	-62.13	146.58
42.0893	-10	84.093	0	1	253.13	11.64	7.066	-2.48	17.736	-62.13	146.58
45.6272	10	84.093	0	1	253.13	11.64	7.066	-2.48	17.736	-62.13	146.58
50.2249	20	84.093	0	1	253.13	11.64	7.066	-2.48	17.736	-62.13	146.58
52.8005	30	84.093	0	1	253.13	11.64	7.066	-2.48	17.736	-62.13	146.58
62.6334	-50	100.581	0	1	324.373	11.999	14.469	-2.48	17.736	-62.13	146.58
72.7147	-30	100.581	0	1	324.373	11.999	14.469	-2.48	17.736	-62.13	146.58
70.552	-10	100.581	0	1	324.373	11.999	14.469	-2.48	17.736	-62.13	146.58
71.3489	10	100.581	0	1	324.373	11.999	14.469	-2.48	17.736	-62.13	146.58
70.8226	20	100.581	0	1	324.373	11.999	14.469	-2.48	17.736	-62.13	146.58
70.7222	30	100.581	0	1	324.373	11.999	14.469	-2.48	17.736	-62.13	146.58
10.3	-50	100.581	0	1	253.13	11.64	7.066	-2.48	17.736	-95.18	69.25
14.7	-30	100.581	0	1	253.13	11.64	7.066	-2.48	17.736	-95.18	69.25
27	-10	100.581	0	1	253.13	11.64	7.066	-2.48	17.736	-95.18	69.25
41.5	10	100.581	0	1	253.13	11.64	7.066	-2.48	17.736	-95.18	69.25
57.3	30	100.581	0	1	253.13	11.64	7.066	-2.48	17.736	-95.18	69.25
66.5	50	100.581	0	1	253.13	11.64	7.066	-2.48	17.736	-95.18	69.25
68.9	70	100.581	0	1	253.13	11.64	7.066	-2.48	17.736	-95.18	69.25
43.6306	-50	100.581	0	1	253.13	11.64	7.066	-2.48	17.736	-170.72	59.82
55.8983	-30	100.581	0	1	253.13	11.64	7.066	-2.48	17.736	-170.72	59.82
67.0524	-10	100.581	0	1	253.13	11.64	7.066	-2.48	17.736	-170.72	59.82
72.0162	10	100.581	0	1	253.13	11.64	7.066	-2.48	17.736	-170.72	59.82
75.9517	30	100.581	0	1	253.13	11.64	7.066	-2.48	17.736	-170.72	59.82
77.758	50	100.581	0	1	253.13	11.64	7.066	-2.48	17.736	-170.72	59.82
16.1016	-30	100.581	0	1	253.13	11.64	7.066	-2.48	17.736	-191.22	136.7
22.0485	-10	100.581	0	1	253.13	11.64	7.066	-2.48	17.736	-191.22	136.7
24.9388	10	100.581	0	1	253.13	11.64	7.066	-2.48	17.736	-191.22	136.7
29.0828	30	100.581	0	1	253.13	11.64	7.066	-2.48	17.736	-191.22	136.7
34.5914	50	100.581	0	1	253.13	11.64	7.066	-2.48	17.736	-191.22	136.7
38.6044	70	100.581	0	1	253.13	11.64	7.066	-2.48	17.736	-191.22	136.7
50.5771	-50	99.895	1	0	322.409	12.136	24.304	-2.48	17.736	-62.13	146.58
54.1425	-30	99.895	1	0	322.409	12.136	24.304	-2.48	17.736	-62.13	146.58
57.41	-10	99.895	1	0	322.409	12.136	24.304	-2.48	17.736	-62.13	146.58
59.5573	10	99.895	1	0	322.409	12.136	24.304	-2.48	17.736	-62.13	146.58
64.1239	20	99.895	1	0	322.409	12.136	24.304	-2.48	17.736	-62.13	146.58
64.7	30	99.895	1	0	322.409	12.136	24.304	-2.48	17.736	-62.13	146.58
47.8976	-50	99.895	1	0	292.11	11.811	14.908	-2.48	17.736	-62.13	146.58
53.1121	-30	99.895	1	0	292.11	11.811	14.908	-2.48	17.736	-62.13	146.58
56.5112	-10	99.895	1	0	292.11	11.811	14.908	-2.48	17.736	-62.13	146.58
59.3833	10	99.895	1	0	292.11	11.811	14.908	-2.48	17.736	-62.13	146.58
59.5349	20	99.895	1	0	292.11	11.811	14.908	-2.48	17.736	-62.13	146.58
59.2594	30	99.895	1	0	292.11	11.811	14.908	-2.48	17.736	-62.13	146.58
49.9398	-50	99.895	1	0	253.13	11.64	7.066	-2.48	17.736	-62.13	146.58
53.1121	-30	99.895	1	0	253.13	11.64	7.066	-2.48	17.736	-62.13	146.58
56.5112	-10	99.895	1	0	253.13	11.64	7.066	-2.48	17.736	-62.13	146.58
59.3833	10	99.895	1	0	253.13	11.64	7.066	-2.48	17.736	-62.13	146.58
59.5349	20	99.895	1	0	253.13	11.64	7.066	-2.48	17.736	-62.13	146.58
64.9324	30	99.895	1	0	253.13	11.64	7.066	-2.48	17.736	-62.13	146.58
55.3419	-50	99.895	1	0	228.836	11.327	1.196	-2.48	17.736	-62.13	146.58
57.5781	-30	99.895	1	0	228.836	11.327	1.196	-2.48	17.736	-62.13	146.58
61.5397	-10	99.895	1	0	228.836	11.327	1.196	-2.48	17.736	-62.13	146.58
66.0642	10	99.895	1	0	228.836	11.327	1.196	-2.48	17.736	-62.13	146.58
74.9256	20	99.895	1	0	228.836	11.327	1.196	-2.48	17.736	-62.13	146.58
94.6	30	99.895	1	0	228.836	11.327	1.196	-2.48	17.736	-62.13	146.58
55.0004	-50	99.895	1	0	228.836	11.327	1.196	-2.36	18.25	-62.13	146.58
57.3664	-30	99.895	1	0	228.836	11.327	1.196	-2.36	18.25	-62.13	146.58
57.7864	-10	99.895	1	0	228.836	11.327	1.196	-2.36	18.25	-62.13	146.58
59.2175	10	99.895	1	0	228.836	11.327	1.196	-2.36	18.25	-62.13	146.58
61.3071	30	99.895	1	0	228.836	11.327	1.196	-2.36	18.25	-62.13	146.58
57.5042	-50	99.895	1	0	228.836	11.327	1.196	-1.54	17.886	-62.13	146.58
60.213	-30	99.895	1	0	228.836	11.327	1.196	-1.54	17.886	-62.13	146.58
61.2128	-10	99.895	1	0	228.836	11.327	1.196	-1.54	17.886	-62.13	146.58
63.2664	10	99.895	1	0	228.836	11.327	1.196	-1.54	17.886	-62.13	146.58
63.5696	30	99.895	1	0	228.836	11.327	1.196	-1.54	17.886	-62.13	146.58
55.4741	-40	99.895	1	0	228.836	11.327	1.196	-4.06	9.692	-62.13	146.58
55.0976	-30	99.895	1	0	228.836	11.327	1.196	-4.06	9.692	-62.13	146.58
62.2864	-10	99.895	1	0	228.836	11.327	1.196	-4.06	9.692	-62.13	146.58
71.4098	-5	99.895	1	0	228.836	11.327	1.196	-4.06	9.692	-62.13	146.58
93.6897	5	99.895	1	0	228.836	11.327	1.196	-4.06	9.692	-62.13	146.58
97.6902	10	99.895	1	0	228.836	11.327	1.196	-4.06	9.692	-62.13	146.58
97.3276	20	99.895	1	0	228.836	11.327	1.196	-4.06	9.692	-62.13	146.58
97.6098	30	99.895	1	0	228.836	11.327	1.196	-4.06	9.692	-62.13	146.58
54.7977	-50	99.895	1	0	292.11	11.811	14.908	-4.06	9.692	-62.13	146.58
56.9865	-30	99.895	1	0	292.11	11.811	14.908	-4.06	9.692	-62.13	146.58
57.023	-10	99.895	1	0	292.11	11.811	14.908	-4.06	9.692	-62.13	146.58
61.6873	10	99.895	1	0	292.11	11.811	14.908	-4.06	9.692	-62.13	146.58
62.259	30	99.895	1	0	292.11	11.811	14.908	-4.06	9.692	-62.13	146.58
53.7593	-10	86.109	1	0	253.13	11.64	7.066	-2.48	17.736	-62.13	146.58
56.9689	10	86.109	1	0	253.13	11.64	7.066	-2.48	17.736	-62.13	146.58
57.4715	20	86.109	1	0	253.13	11.64	7.066	-2.48	17.736	-62.13	146.58
57.9811	30	86.109	1	0	253.13	11.64	7.066	-2.48	17.736	-62.13	146.58
61.2266	-50	99.895	1	0	253.13	11.64	7.066	-2.48	17.736	-95.18	69.25
63.8061	-30	99.895	1	0	253.13	11.64	7.066	-2.48	17.736	-95.18	69.25
66.6538	-10	99.895	1	0	253.13	11.64	7.066	-2.48	17.736	-95.18	69.25
70.226	10	99.895	1	0	253.13	11.64	7.066	-2.48	17.736	-95.18	69.25
74.427	30	99.895	1	0	253.13	11.64	7.066	-2.48	17.736	-95.18	69.25
78.4929	50	99.895	1	0	253.13	11.64	7.066	-2.48	17.736	-95.18	69.25
87.1314	70	99.895	1	0	253.13	11.64	7.066	-2.48	17.736	-95.18	69.25
64.9425	-30	99.895	1	0	253.13	11.64	7.066	-2.48	17.736	-191.22	136.7
65.8595	-10	99.895	1	0	253.13	11.64	7.066	-2.48	17.736	-191.22	136.7
74.3968	10	99.895	1	0	253.13	11.64	7.066	-2.48	17.736	-191.22	136.7
91.29	20	99.895	1	0	253.13	11.64	7.066	-2.48	17.736	-191.22	136.7
97.1401	30	99.895	1	0	253.13	11.64	7.066	-2.48	17.736	-191.22	136.7
98.5569	50	99.895	1	0	253.13	11.64	7.066	-2.48	17.736	-191.22	136.7
98.2035	70	99.895	1	0	253.13	11.64	7.066	-2.48	17.736	-191.22	136.7
71.9502	-50	99.895	1	0	253.13	11.64	7.066	-2.48	17.736	-170.72	59.82
75.1265	-30	99.895	1	0	253.13	11.64	7.066	-2.48	17.736	-170.72	59.82
76.3978	-10	99.895	1	0	253.13	11.64	7.066	-2.48	17.736	-170.72	59.82
79.5703	10	99.895	1	0	253.13	11.64	7.066	-2.48	17.736	-170.72	59.82
81.6126	30	99.895	1	0	253.13	11.64	7.066	-2.48	17.736	-170.72	59.82
83.9183	50	99.895	1	0	253.13	11.64	7.066	-2.48	17.736	-170.72	59.82
100	-50	99.895	1	0	314.757	11.907	14.32	-2.48	17.736	-62.13	146.58
100	-30	99.895	1	0	314.757	11.907	14.32	-2.48	17.736	-62.13	146.58
100	-10	99.895	1	0	314.757	11.907	14.32	-2.48	17.736	-62.13	146.58
100	10	99.895	1	0	314.757	11.907	14.32	-2.48	17.736	-62.13	146.58
100	20	99.895	1	0	314.757	11.907	14.32	-2.48	17.736	-62.13	146.58
100	30	99.895	1	0	314.757	11.907	14.32	-2.48	17.736	-62.13	146.58
65.4	-30	100.581	0	1	253.13	11.64	7.066	-2.48	17.736	-126.36	92.35
58.2	-10	100.581	0	1	253.13	11.64	7.066	-2.48	17.736	-126.36	92.35
61.6	10	100.581	0	1	253.13	11.64	7.066	-2.48	17.736	-126.36	92.35
65.5	30	100.581	0	1	253.13	11.64	7.066	-2.48	17.736	-126.36	92.35
69.1	50	100.581	0	1	253.13	11.64	7.066	-2.48	17.736	-126.36	92.35
70.2	70	100.581	0	1	253.13	11.64	7.066	-2.48	17.736	-126.36	92.35
57.7889	-30	99.895	1	0	253.13	11.64	7.066	-2.48	17.736	-126.36	92.35
61.3283	-10	99.895	1	0	253.13	11.64	7.066	-2.48	17.736	-126.36	92.35
64.4824	10	99.895	1	0	253.13	11.64	7.066	-2.48	17.736	-126.36	92.35
66.3238	30	99.895	1	0	253.13	11.64	7.066	-2.48	17.736	-126.36	92.35
66.2335	50	99.895	1	0	253.13	11.64	7.066	-2.48	17.736	-126.36	92.35
49.07	70	99.895	1	0	253.13	11.64	7.066	-2.48	17.736	-126.36	92.35
17.4	-50	98.357	0	0	253.13	11.64	7.066	-2.48	17.736	-94.82	74.38
25.9	-30	98.357	0	0	253.13	11.64	7.066	-2.48	17.736	-94.82	74.38
39.6	-10	98.357	0	0	253.13	11.64	7.066	-2.48	17.736	-94.82	74.38
47.2	10	98.357	0	0	253.13	11.64	7.066	-2.48	17.736	-94.82	74.38
54	30	98.357	0	0	253.13	11.64	7.066	-2.48	17.736	-94.82	74.38
58.2	50	98.357	0	0	253.13	11.64	7.066	-2.48	17.736	-94.82	74.38
60.1	70	98.357	0	0	253.13	11.64	7.066	-2.48	17.736	-94.82	74.38
37.4	-50	98.357	0	0	253.13	11.64	7.066	-2.48	17.736	-37.44	170.92
47.5	-30	98.357	0	0	253.13	11.64	7.066	-2.48	17.736	-37.44	170.92
58.1	-10	98.357	0	0	253.13	11.64	7.066	-2.48	17.736	-37.44	170.92
64.3	10	98.357	0	0	253.13	11.64	7.066	-2.48	17.736	-37.44	170.92
70.2	30	98.357	0	0	253.13	11.64	7.066	-2.48	17.736	-37.44	170.92
72.9	50	98.357	0	0	253.13	11.64	7.066	-2.48	17.736	-37.44	170.92
37.6	-50	103.043	0	0	253.13	11.64	7.066	-2.48	17.736	-37.44	170.92
46.2	-30	103.043	0	0	253.13	11.64	7.066	-2.48	17.736	-37.44	170.92
54.6	-10	103.043	0	0	253.13	11.64	7.066	-2.48	17.736	-37.44	170.92
62.9	10	103.043	0	0	253.13	11.64	7.066	-2.48	17.736	-37.44	170.92
67.3	30	103.043	0	0	253.13	11.64	7.066	-2.48	17.736	-37.44	170.92
73	50	103.043	0	0	253.13	11.64	7.066	-2.48	17.736	-37.44	170.92
