# Supplementary material for: Predicting glycosylation stereoselectivity using machine learning
Source: Chem Sci. 2020 Dec 26;12(8):2931–9. doi: 10.1039/d0sc06222g (PMC8179398; doi:10.1039/d0sc06222g)
Supplement: SC-012-D0SC06222G-s005 [file SC-012-D0SC06222G-s005.xlsx]

## Sheet: Sheet1
a	Temperature (°C)	Don C1	C2	C4	Acc O chem shift	Acc O exposed area	Acc aC exposed area	Act CB HOMO	Act CB exposed area	Sol E_Min	Sol E_Max
31.3	-30	98.888	0	0	253.13	11.64	7.066	-2.48	17.736	-62.13	146.58
44.7	-10	98.888	0	0	253.13	11.64	7.066	-2.48	17.736	-62.13	146.58
53.2	10	98.888	0	0	253.13	11.64	7.066	-2.48	17.736	-62.13	146.58
57.9	20	98.888	0	0	253.13	11.64	7.066	-2.48	17.736	-62.13	146.58
61.5	30	98.888	0	0	253.13	11.64	7.066	-2.48	17.736	-62.13	146.58
34.3	-30	97.28	0	1	253.13	11.64	7.066	-2.48	17.736	-62.13	146.58
41.5	-10	97.28	0	1	253.13	11.64	7.066	-2.48	17.736	-62.13	146.58
47.3	10	97.28	0	1	253.13	11.64	7.066	-2.48	17.736	-62.13	146.58
50.1	20	97.28	0	1	253.13	11.64	7.066	-2.48	17.736	-62.13	146.58
52.7	30	97.28	0	1	253.13	11.64	7.066	-2.48	17.736	-62.13	146.58
63.9	20	102.558	1	0	253.13	11.64	7.066	-2.48	17.736	-62.13	146.58
62.1	30	102.558	1	0	253.13	11.64	7.066	-2.48	17.736	-62.13	146.58
19.9	-50	102.907	0	1	253.13	11.64	7.066	-2.48	17.736	-62.13	146.58
30	-30	102.907	0	1	253.13	11.64	7.066	-2.48	17.736	-62.13	146.58
33.6	-10	102.907	0	1	253.13	11.64	7.066	-2.48	17.736	-62.13	146.58
39.7	10	102.907	0	1	253.13	11.64	7.066	-2.48	17.736	-62.13	146.58
48.9	-50	100.581	0	1	306.933	11.134	13.276	-2.48	17.736	-62.13	146.58
56.5	-30	100.581	0	1	306.933	11.134	13.276	-2.48	17.736	-62.13	146.58
61.5	-10	100.581	0	1	306.933	11.134	13.276	-2.48	17.736	-62.13	146.58
65.7	10	100.581	0	1	306.933	11.134	13.276	-2.48	17.736	-62.13	146.58
69.7	30	100.581	0	1	306.933	11.134	13.276	-2.48	17.736	-62.13	146.58
42.4	-50	100.581	0	1	304.638	11.797	13.355	-2.48	17.736	-62.13	146.58
51.9	-30	100.581	0	1	304.638	11.797	13.355	-2.48	17.736	-62.13	146.58
62.6	-10	100.581	0	1	304.638	11.797	13.355	-2.48	17.736	-62.13	146.58
67.1	10	100.581	0	1	304.638	11.797	13.355	-2.48	17.736	-62.13	146.58
69.2	20	100.581	0	1	304.638	11.797	13.355	-2.48	17.736	-62.13	146.58
71.9	30	100.581	0	1	304.638	11.797	13.355	-2.48	17.736	-62.13	146.58
18.5	-50	100.581	0	1	253.13	11.64	7.066	-4.07	10.614	-62.13	146.58
26.2	-30	100.581	0	1	253.13	11.64	7.066	-4.07	10.614	-62.13	146.58
32.6	-10	100.581	0	1	253.13	11.64	7.066	-4.07	10.614	-62.13	146.58
41	10	100.581	0	1	253.13	11.64	7.066	-4.07	10.614	-62.13	146.58
47.1	30	100.581	0	1	253.13	11.64	7.066	-4.07	10.614	-62.13	146.58
36.7	-50	99.895	1	0	228.836	11.327	1.196	-4.07	10.614	-62.13	146.58
42.8	-30	99.895	1	0	228.836	11.327	1.196	-4.07	10.614	-62.13	146.58
48.2	-10	99.895	1	0	228.836	11.327	1.196	-4.07	10.614	-62.13	146.58
64.4	10	99.895	1	0	228.836	11.327	1.196	-4.07	10.614	-62.13	146.58
98	30	99.895	1	0	228.836	11.327	1.196	-4.07	10.614	-62.13	146.58
31.7	-20	98.357	0	0	253.13	11.64	7.066	-2.48	17.736	-79.32	105.79
51.8	10	98.357	0	0	253.13	11.64	7.066	-2.48	17.736	-79.32	105.79
60.3	30	98.357	0	0	253.13	11.64	7.066	-2.48	17.736	-79.32	105.79
61.9	50	98.357	0	0	253.13	11.64	7.066	-2.48	17.736	-79.32	105.79
64.4	70	98.357	0	0	253.13	11.64	7.066	-2.48	17.736	-79.32	105.79
63.3	90	98.357	0	0	253.13	11.64	7.066	-2.48	17.736	-79.32	105.79
67.9276	20	100.581	0	1	253.13	11.64	7.066	-2.48	17.736	-156.08	75.7
71.3382	40	100.581	0	1	253.13	11.64	7.066	-2.48	17.736	-156.08	75.7
73.0578	60	100.581	0	1	253.13	11.64	7.066	-2.48	17.736	-156.08	75.7
73.9154	80	100.581	0	1	253.13	11.64	7.066	-2.48	17.736	-156.08	75.7
74.2431	100	100.581	0	1	253.13	11.64	7.066	-2.48	17.736	-156.08	75.7
