# Supplementary material for: Predicting glycosylation stereoselectivity using machine learning
Source: Chem Sci. 2020 Dec 26;12(8):2931–9. doi: 10.1039/d0sc06222g (PMC8179398; doi:10.1039/d0sc06222g)
Supplement: SC-012-D0SC06222G-s006 [file SC-012-D0SC06222G-s006.xlsx]

## Sheet: Sheet1
a	Temperature (°C)	Don C1	C2	C4	Acc O chem shift	Acc O exposed area	Acc aC exposed area	Act CB HOMO	Act CB exposed area	Sol E_Min	Sol E_Max
31.4024	-50	103.043	0	0	292.11	11.811	14.908	-2.48	17.736	-95.18	69.25
37.0644	-30	103.043	0	0	292.11	11.811	14.908	-2.48	17.736	-95.18	69.25
46.706	-10	103.043	0	0	292.11	11.811	14.908	-2.48	17.736	-95.18	69.25
54.7003	10	103.043	0	0	292.11	11.811	14.908	-2.48	17.736	-95.18	69.25
60.7833	30	103.043	0	0	292.11	11.811	14.908	-2.48	17.736	-95.18	69.25
60.586	50	103.043	0	0	292.11	11.811	14.908	-2.48	17.736	-95.18	69.25
63.2041	70	103.043	0	0	292.11	11.811	14.908	-2.48	17.736	-95.18	69.25
79.5753	-50	103.043	0	0	228.836	11.327	1.196	-2.48	17.736	-95.18	69.25
78.5554	-30	103.043	0	0	228.836	11.327	1.196	-2.48	17.736	-95.18	69.25
76.6188	-10	103.043	0	0	228.836	11.327	1.196	-2.48	17.736	-95.18	69.25
74.0781	10	103.043	0	0	228.836	11.327	1.196	-2.48	17.736	-95.18	69.25
71.2393	30	103.043	0	0	228.836	11.327	1.196	-2.48	17.736	-95.18	69.25
68.5038	50	103.043	0	0	228.836	11.327	1.196	-2.48	17.736	-95.18	69.25
65.1394	70	103.043	0	0	228.836	11.327	1.196	-2.48	17.736	-95.18	69.25
23.3808	-50	102.96	0	1	253.13	11.64	7.066	-2.48	17.736	-62.13	146.58
32.4163	-30	102.96	0	1	253.13	11.64	7.066	-2.48	17.736	-62.13	146.58
39.7188	-10	102.96	0	1	253.13	11.64	7.066	-2.48	17.736	-62.13	146.58
47.1801	10	102.96	0	1	253.13	11.64	7.066	-2.48	17.736	-62.13	146.58
55.0491	30	102.96	0	1	253.13	11.64	7.066	-2.48	17.736	-62.13	146.58
33.0259	-50	102.96	0	1	253.13	11.64	7.066	-2.48	17.736	-95.18	69.25
34.324	-30	102.96	0	1	253.13	11.64	7.066	-2.48	17.736	-95.18	69.25
39.9309	-10	102.96	0	1	253.13	11.64	7.066	-2.48	17.736	-95.18	69.25
47.2864	10	102.96	0	1	253.13	11.64	7.066	-2.48	17.736	-95.18	69.25
56.317	30	102.96	0	1	253.13	11.64	7.066	-2.48	17.736	-95.18	69.25
62.7115	50	102.96	0	1	253.13	11.64	7.066	-2.48	17.736	-95.18	69.25
68.6102	70	102.96	0	1	253.13	11.64	7.066	-2.48	17.736	-95.18	69.25
